# Supplementary material for: The Effect of Cholesterol in MCF7 Human Breast Cancer Cells
Source: MDPI journal article supplement (doi:10.3390/ijms24065935), 2023-03-21
Supplement: s1 [file s1]

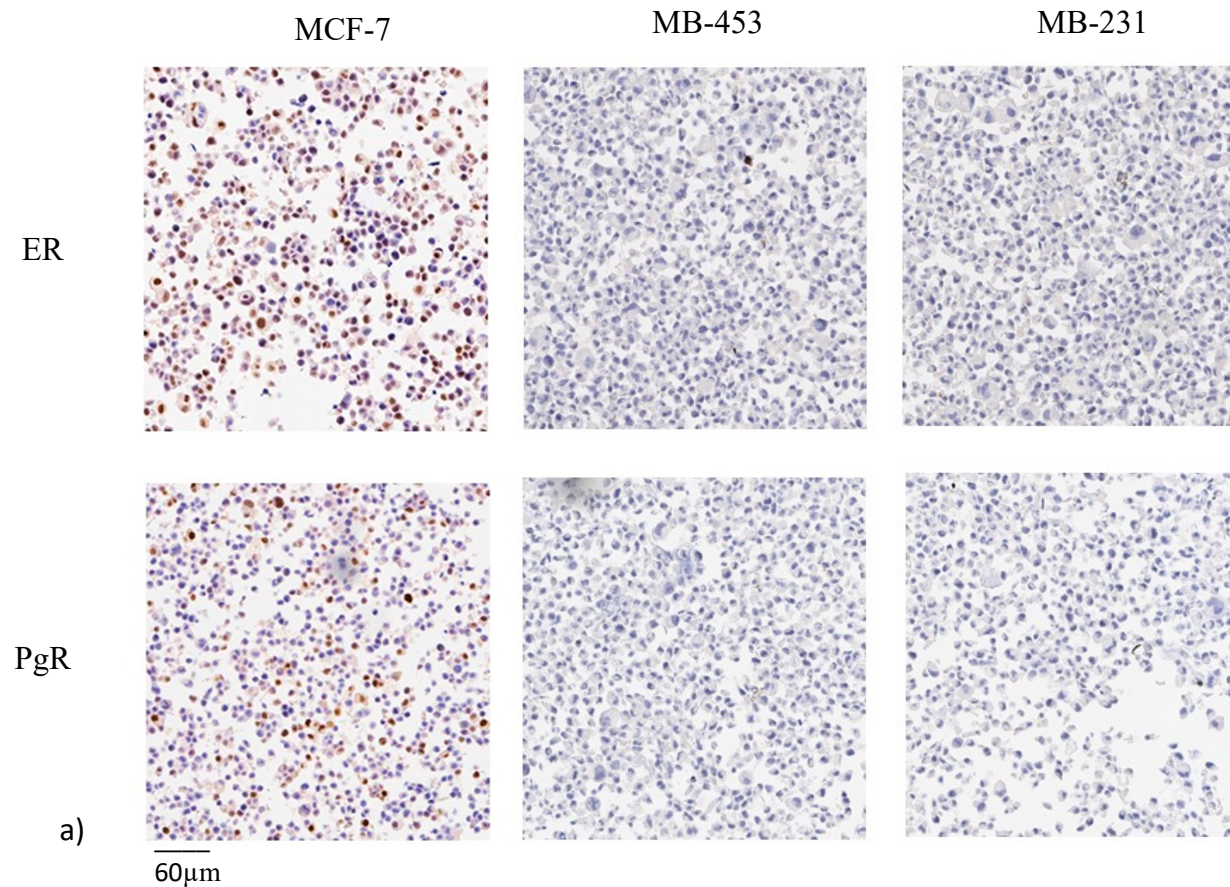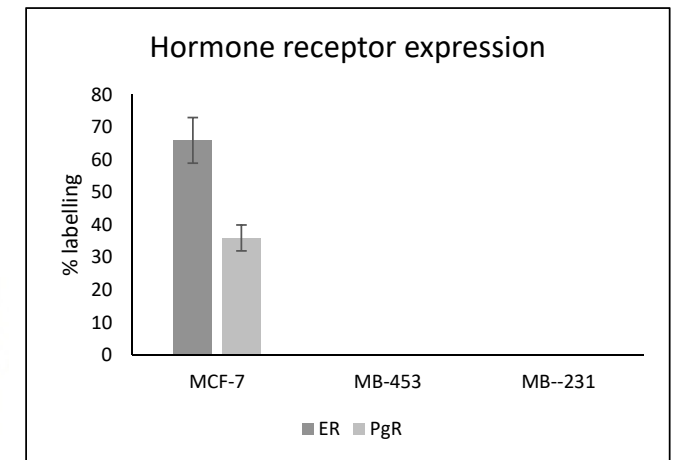

b)

**Figure S1.** Characterization of cell lines. a) Immunohistochemical analysis of ER and PgR in MCF-7, MB-453 and MB-231; b) analysis of positive cells expressed in percent. Data are expressed as the mean  $\pm$  S.D. of 2 independent experiments performed in duplicate. \*  $p < 0.001$

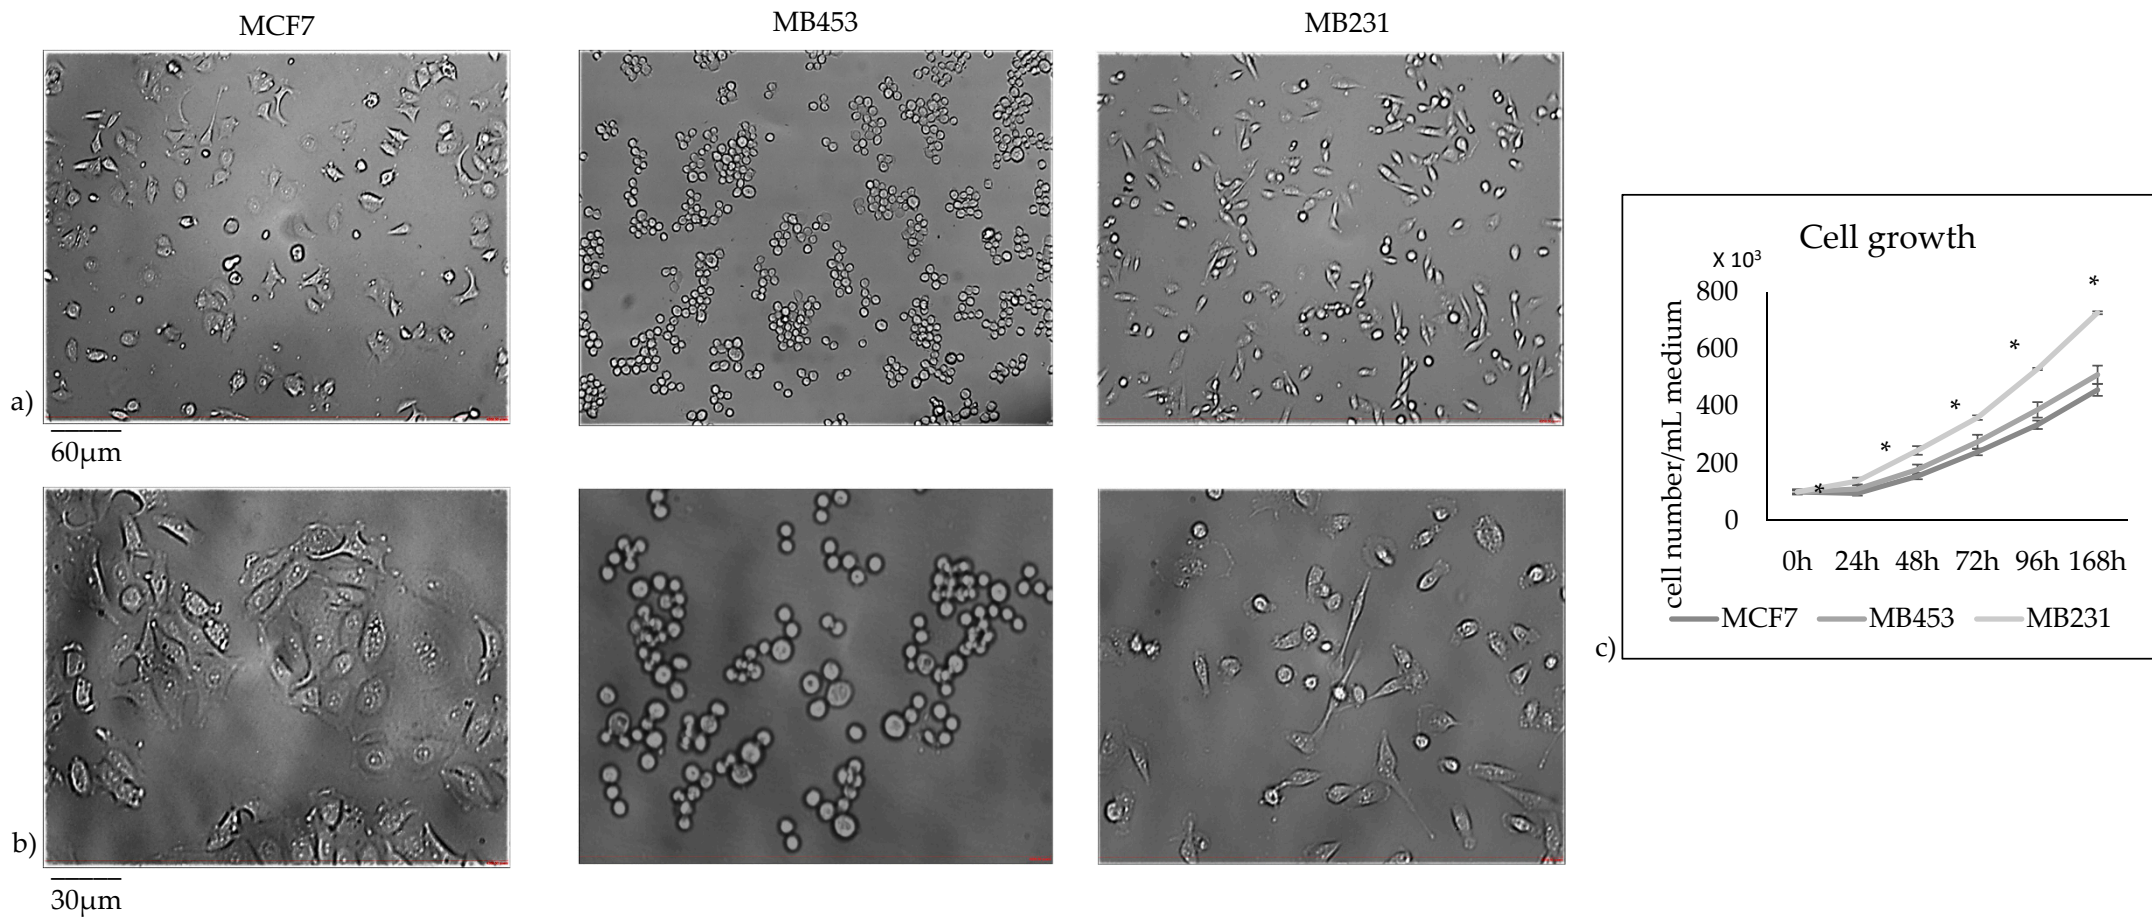

**Figure S2.** Characteristics of MCF7, MB453, MB231 cells after 48hrs of culture. a) cell morphology (20x magnification); b) cell morphology (40x magnification); c) cell growth at different times of cell culture. The cells were seeded at  $100 \times 10^3$  cell concentration at 0h. Data are expressed as the mean  $\pm$  S.D. of 3 independent experiments performed in duplicate. \*  $p < 0.05$  versus 0h.
